# Supplementary material for: Strap associates with Csde1 and affects expression of select Csde1-bound transcripts
Source: PubMed Central journal article supplement (PMC6107111; doi:10.1371/journal.pone.0201690), 2018-08-23
Supplement: pone.0201690.s003.pdf [file pone.0201690.s003.pdf]

### S3 Figure

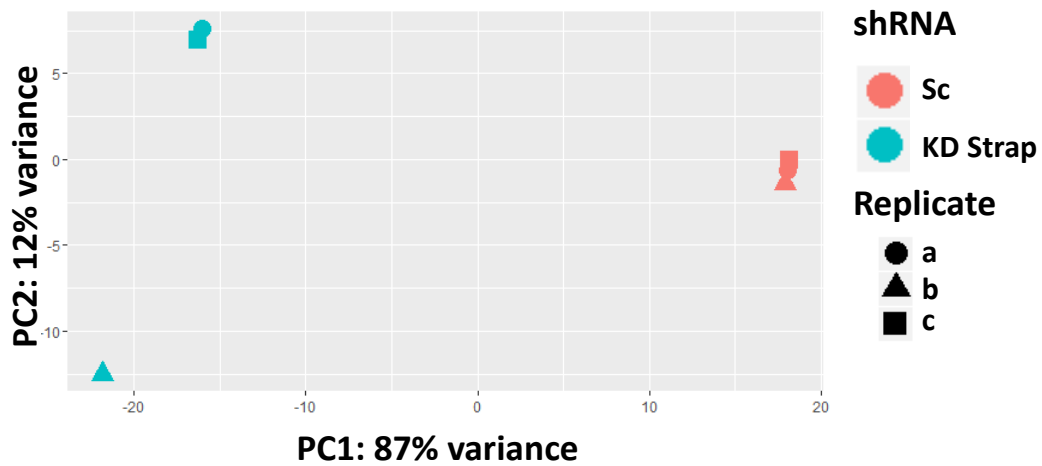

**S3 Figure. Principal component analysis on RNAseq results of Strap knockdown in MEL.** Depicted are both shRNA and replicate groups, indicating that the shRNA is responsible for the majority of variation between samples. PC2 (12%) is the result of minor batch effects.
