# Supplementary material for: Strap associates with Csde1 and affects expression of select Csde1-bound transcripts
Source: PubMed Central journal article supplement (PMC6107111; doi:10.1371/journal.pone.0201690), 2018-08-23
Supplement: pone.0201690.s005.pdf [file pone.0201690.s005.pdf]

# S5 Figure

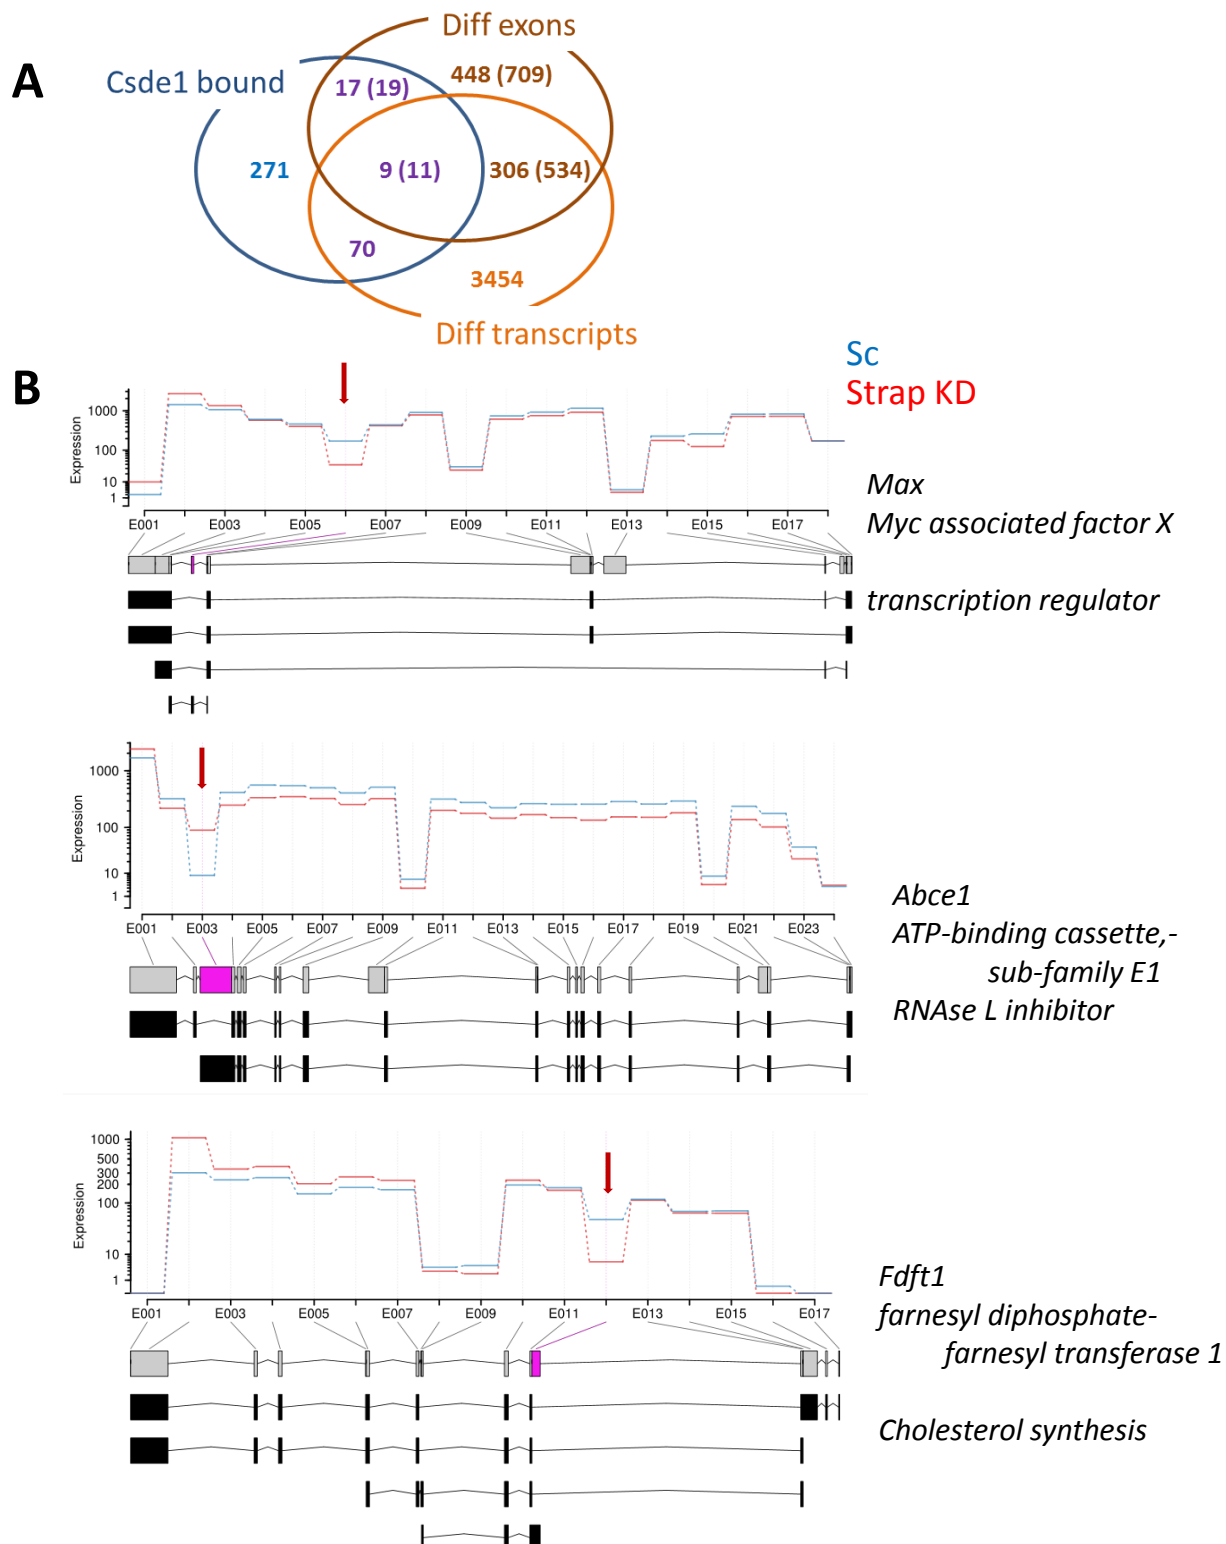

**S5 Figure, Differentially expressed exons. (A)** Venn diagram depicting the number of Csde1-bound transcripts (blue), and the number of differentially expressed transcripts detected at the transcript level (orange) or single exon level (brown; number of exons between parenthesis) comparing MEL cells treated with Sc control shRNA or anti-Strap. **(B)** Examples of transcripts with alternative exon usage between MEL cells expressing Sc (blue line) or anti-Strap (red line) shRNA. Transcript names (short and full) and function are indicated, expression is in cpm on a 10log scale. Exons are numbered on the x-axes, which corresponds to the graphic representation of all exons (in grey) below, together with known transcript variants. The differentially expressed exon is pink, and indicated with a red arrow
